# Supplementary material for: Gold(I) Complexes Bearing Alkylated 1,3,5-Triaza-7-phosphaadamantane Ligands as Thermoresponsive Anticancer Agents in Human Colon Cells
Source: MDPI journal article supplement (doi:10.3390/biomedicines9121848), 2021-12-06
Supplement: s1 [file s1]

# Gold(I) complexes bearing alkylated 1,3,5-triaza-7-phosphaadamantane ligands as thermoresponsive anticancer agents in colon cells

Javier Quero,<sup>1,2</sup> Francesco Ruighi,<sup>1</sup> Jesús Osada,<sup>3</sup> M. Concepción Gimeno,<sup>1</sup> Elena Cerrada,<sup>1\*</sup> and Maria Jesús Rodríguez-Yoldi,<sup>2\*</sup>

<sup>1</sup> Departamento de Química Inorgánica, Instituto de Síntesis Química y Catálisis Homogénea-ISQCH, Universidad de Zaragoza-C.S.I.C., 50009 Zaragoza, Spain. E-mail: [ecerrada@unizar.es](mailto:ecerrada@unizar.es); [francesco.ruighi@edu.unito.it](mailto:francesco.ruighi@edu.unito.it) and [gimeno@unizar.es](mailto:gimeno@unizar.es)

<sup>2</sup> Departamento de Farmacología y Fisiología y Medicina Legal y Forense. Unidad de Fisiología, Universidad de Zaragoza, 50013, Zaragoza, Spain, CIBERobn, IIS Aragón, IA2. E-mail: [mjrodyol@unizar.es](mailto:mjrodyol@unizar.es) and [javierquero94@gmail.com](mailto:javierquero94@gmail.com)

<sup>3</sup> Departamento de Bioquímica y Biología Molecular. Unidad de Bioquímica. Universidad de Zaragoza, 50013, Zaragoza, Spain, CIBERobn, IIS Aragón, IA2. E-mail: [josadal@unizar.es](mailto:josadal@unizar.es)

\* Correspondence: [mjrodyol@unizar.es](mailto:mjrodyol@unizar.es) and [ecerrada@unizar.es](mailto:ecerrada@unizar.es)

**Citation:** Quero, J.; Ruighi, F.; Gimeno, M.C.; Cerrada, E., Rodríguez-Yoldi, M.J. Thermoresponsive gold derivatives as anticancer agents. *Biomedicines* **2021**, *9*, x. <https://doi.org/10.3390/xxxxx>

Academic Editor: Firstname  
Lastname

Received: date  
Accepted: date  
Published: date

**Publisher's Note:** MDPI stays neutral with regard to jurisdictional claims in published maps and institutional affiliations.

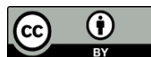

**Copyright:** © 2021 by the authors. Submitted for possible open access publication under the terms and conditions of the Creative Commons Attribution (CC BY) license (<https://creativecommons.org/licenses/by/4.0/>).

## Table of Contents

Figures S1-S38. <sup>1</sup>H, <sup>19</sup>F {<sup>1</sup>H}, <sup>31</sup>P {<sup>1</sup>H}, <sup>13</sup>C {<sup>1</sup>H} and HSQC NMR spectra of gold(I) complexes

Figure S39. UV-Vis spectra from stability assays

Figure S40. Correlation between cytotoxic activity of the complexes and logD<sub>7.4</sub>.

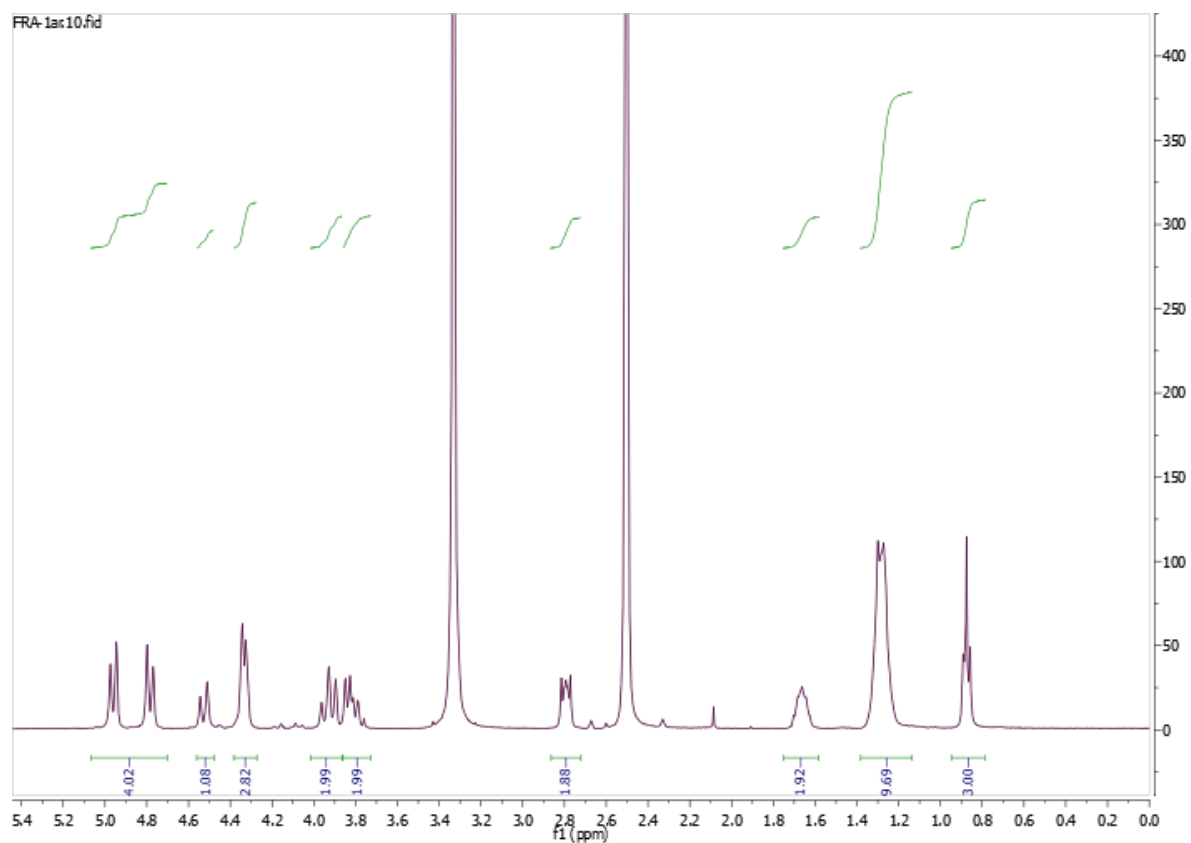

**Figure S1.**  $^1\text{H}$  NMR spectrum of [PTA-CH<sub>2</sub>-(CH<sub>2</sub>)<sub>6</sub>-CH<sub>3</sub>]I (**La**)

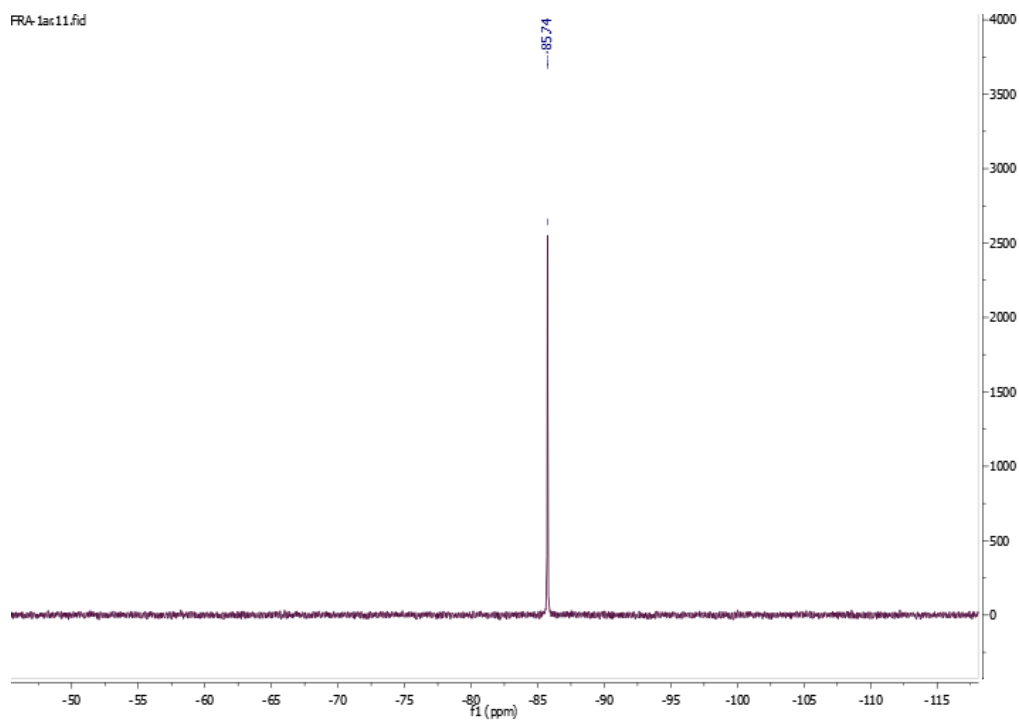

**Figure S2.**  $^{31}\text{P}\{^1\text{H}\}$  NMR spectrum of [PTA-CH<sub>2</sub>-(CH<sub>2</sub>)<sub>6</sub>-CH<sub>3</sub>]I (**La**)

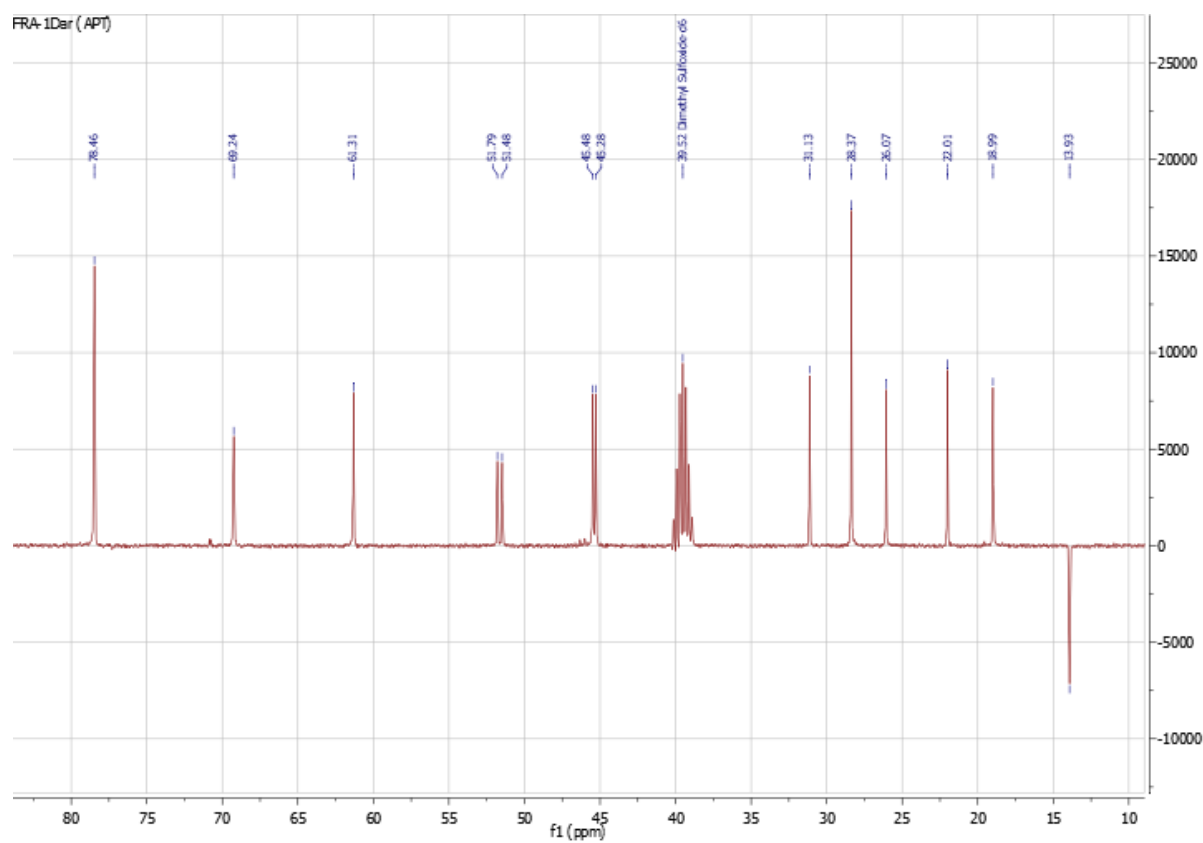

**Figure S3.**  $^{13}\text{C}$   $\{^1\text{H}\}$ -APT spectrum of [PTA-CH<sub>2</sub>-(CH<sub>2</sub>)<sub>6</sub>-CH<sub>3</sub>]I (**La**) in dms0-d<sub>6</sub>

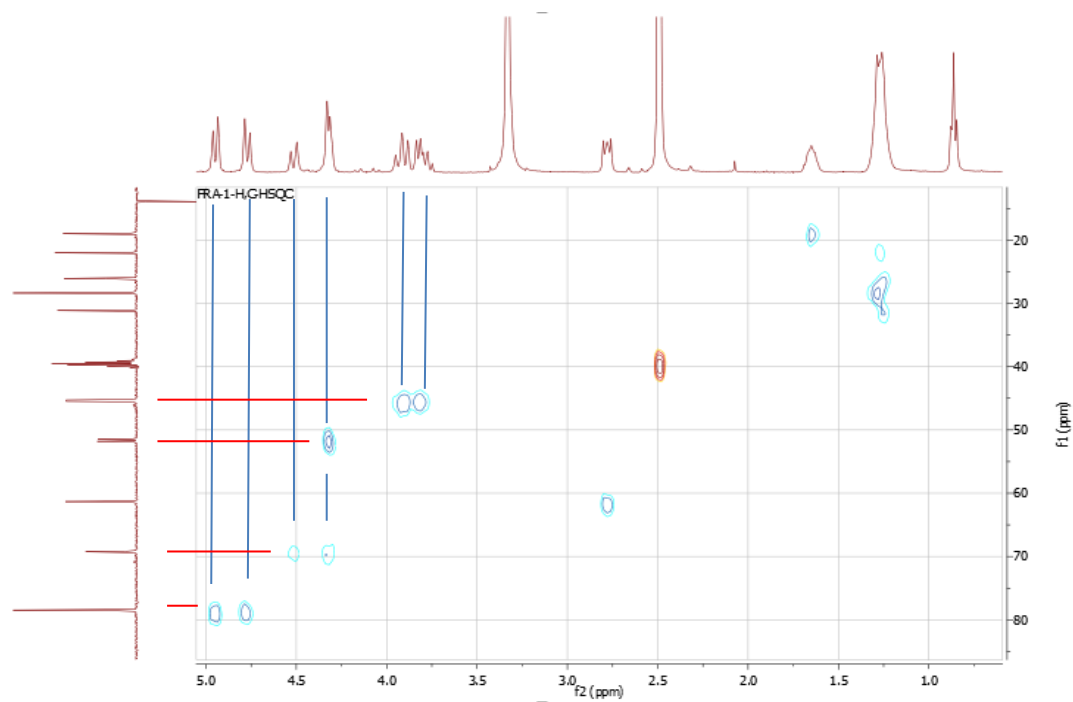

**Figure S4.** C,H-HSQC experiment of [PTA-CH<sub>2</sub>-(CH<sub>2</sub>)<sub>6</sub>-CH<sub>3</sub>]I (**La**) in dms0-d<sub>6</sub>

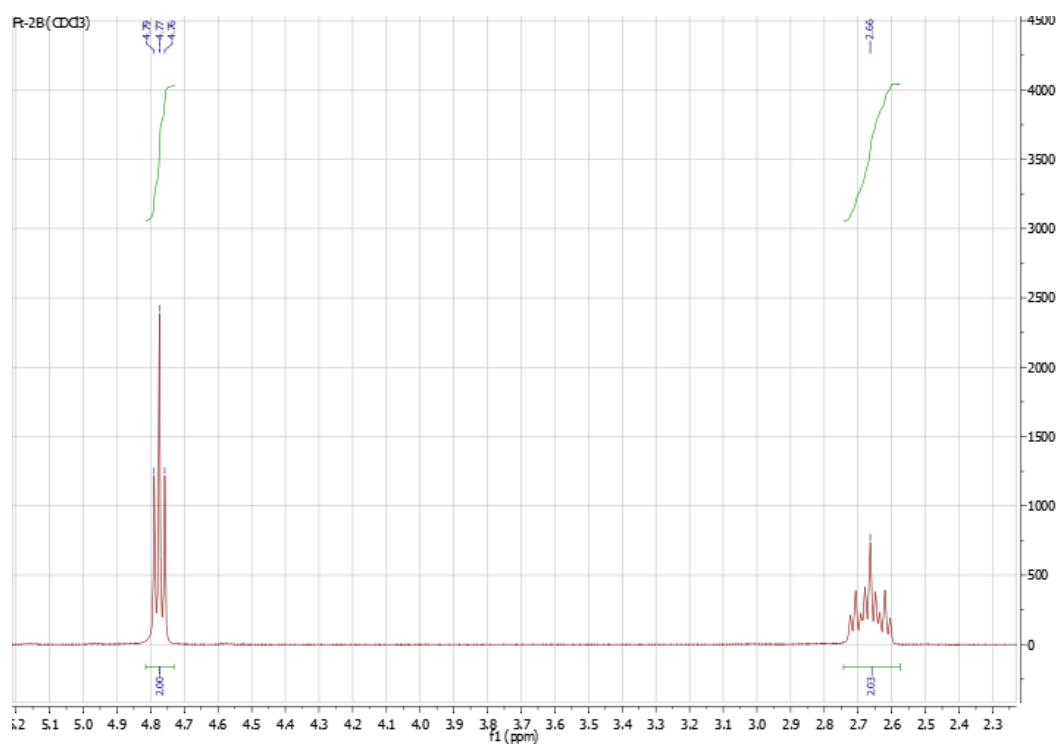

**Figure S5.** <sup>1</sup>H NMR spectrum of TfOCH<sub>2</sub>CH<sub>2</sub>(CF<sub>2</sub>)<sub>5</sub>CF<sub>3</sub> in CDCl<sub>3</sub>

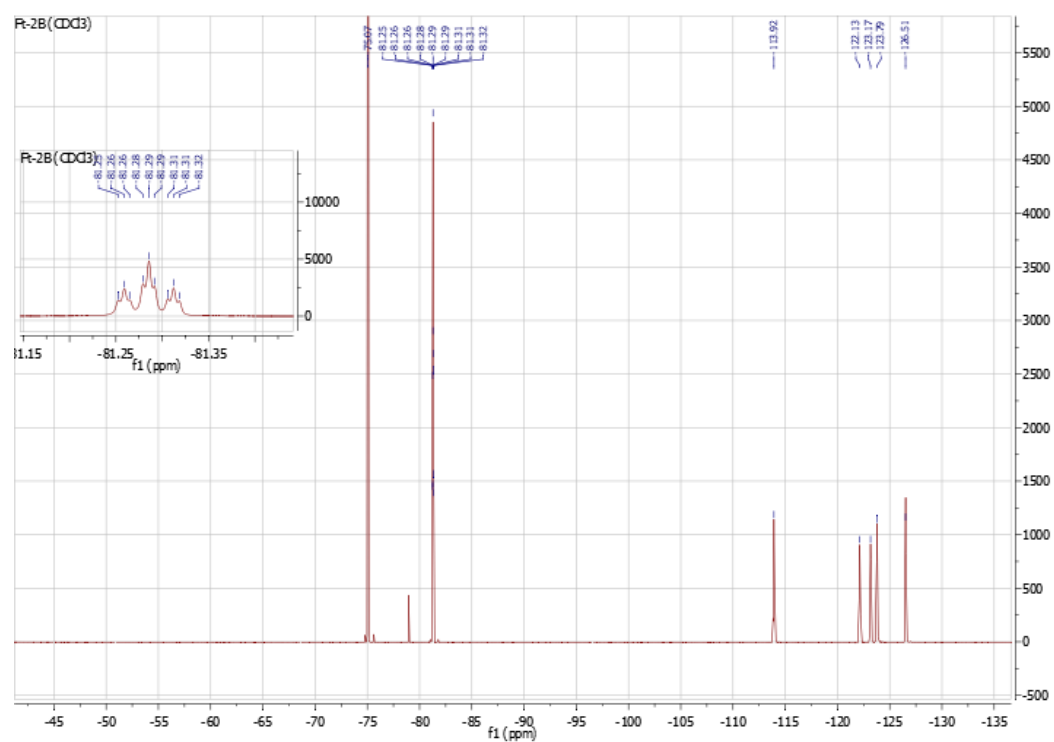

**Figure S6.** <sup>19</sup>F {<sup>1</sup>H} NMR spectrum of TfOCH<sub>2</sub>CH<sub>2</sub>(CF<sub>2</sub>)<sub>5</sub>CF<sub>3</sub> in CDCl<sub>3</sub>

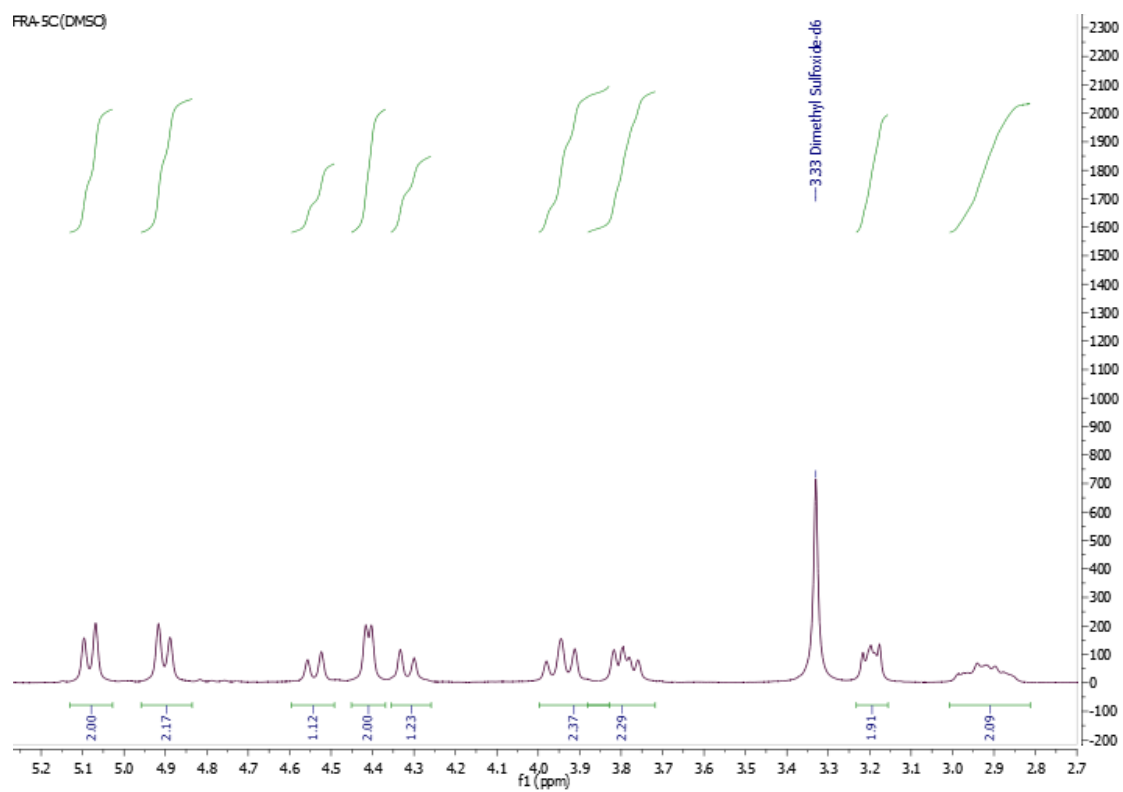

**Figure S7.**  $^1\text{H}$  NMR spectrum of [PTA-CH<sub>2</sub>CH<sub>2</sub>(CF<sub>2</sub>)<sub>5</sub>CF<sub>3</sub>]TfO (**Lb**) in dmsO-d<sub>6</sub>

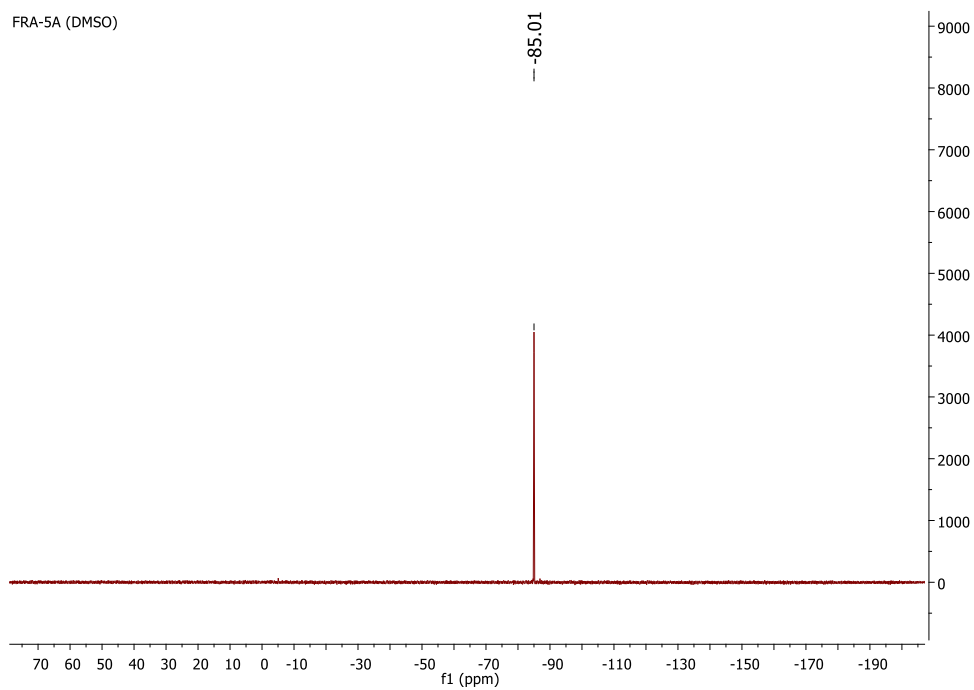

**Figure S8.**  $^{31}\text{P}\{^1\text{H}\}$  NMR spectrum of [PTA-CH<sub>2</sub>CH<sub>2</sub>(CF<sub>2</sub>)<sub>5</sub>CF<sub>3</sub>]TfO (**Lb**) in dmsO-d<sub>6</sub>

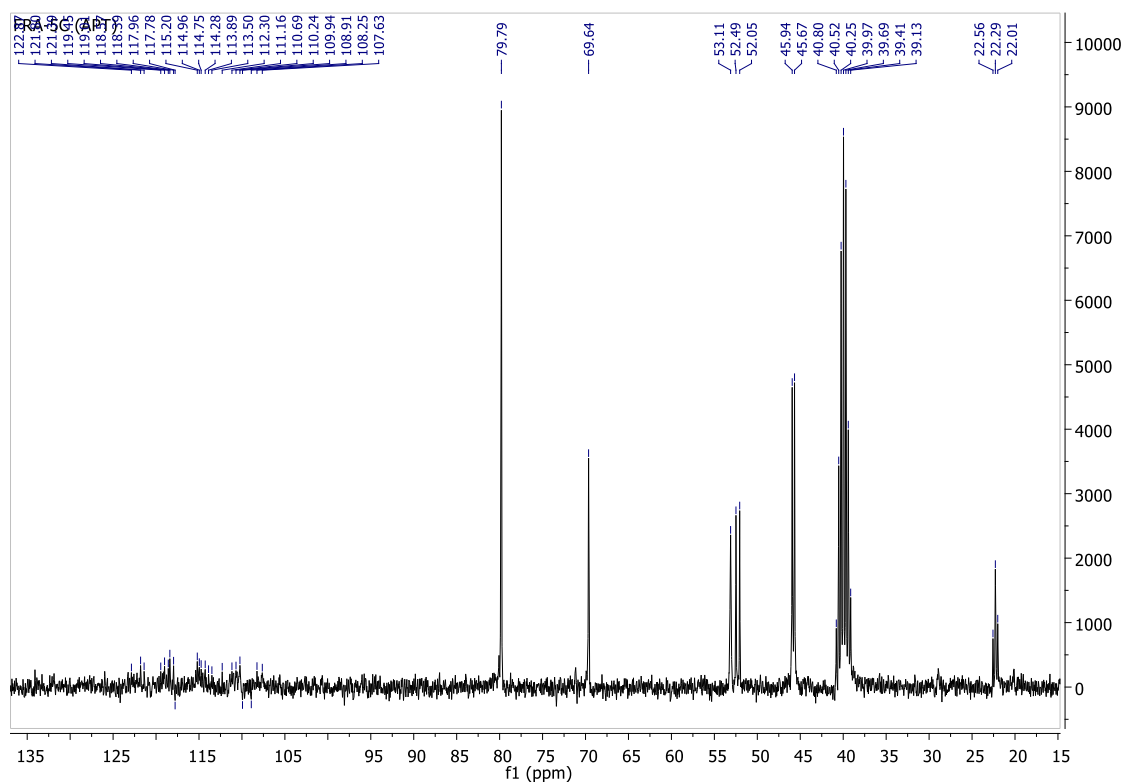

**Figure S9.**  $^{13}\text{C}$   $\{^1\text{H}\}$  NMR spectrum of [PTA- $\text{CH}_2\text{CH}_2(\text{CF}_2)_5\text{CF}_3$ ]TfO (**Lb**) in  $\text{dms0-d}_6$

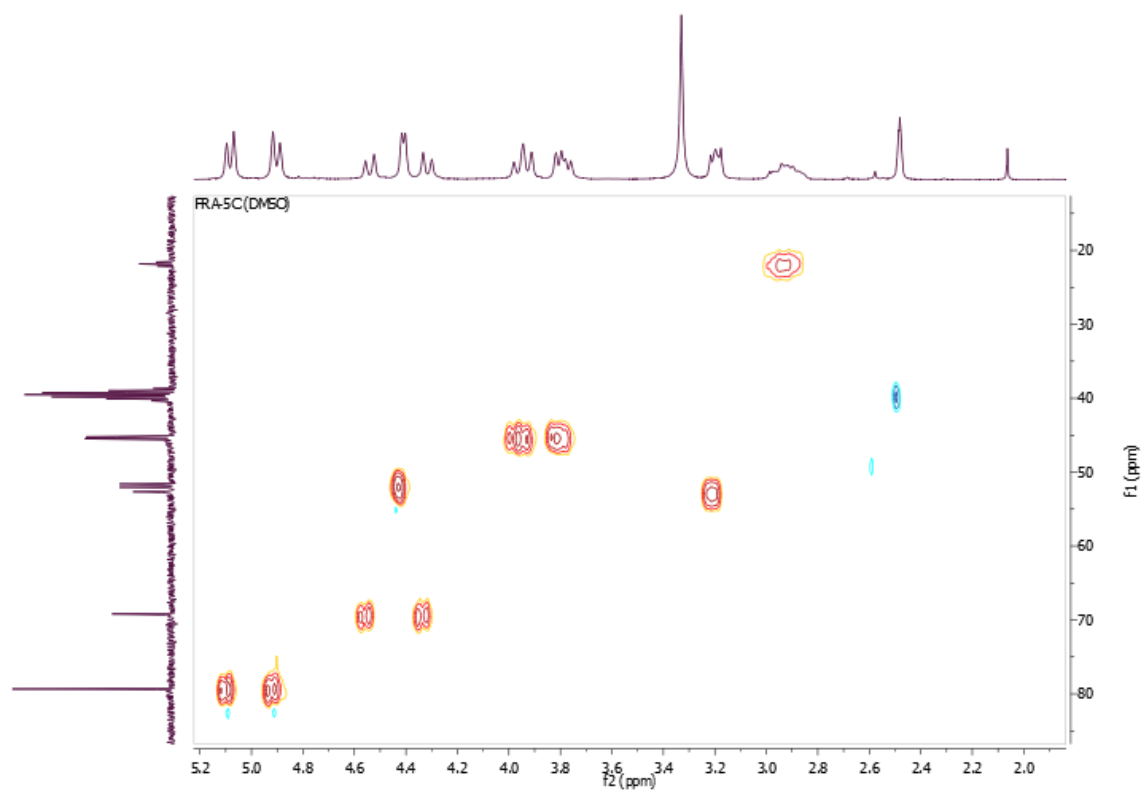

**Figure S10.** C,H-HSQC experiment of [PTA- $\text{CH}_2\text{CH}_2(\text{CF}_2)_5\text{CF}_3$ ]TfO (**Lb**) in  $\text{dms0-d}_6$

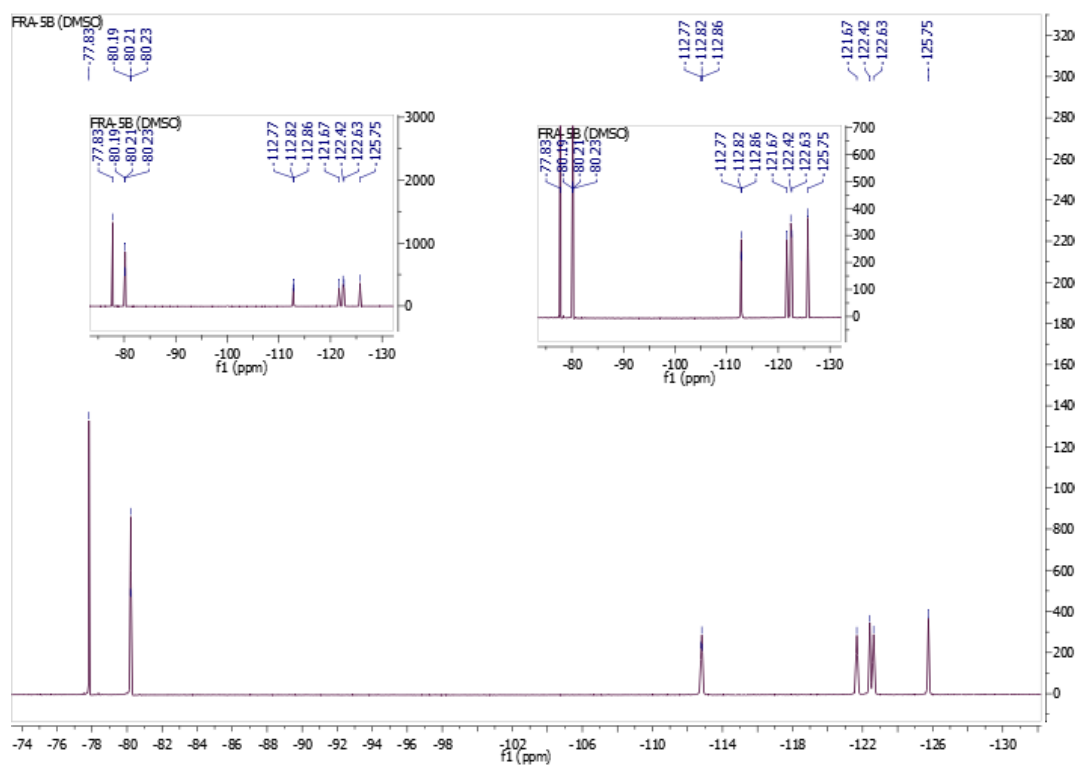

**Figure S11.**  $^{19}\text{F}$   $\{^1\text{H}\}$  NMR spectrum of  $[\text{PTA-CH}_2\text{CH}_2(\text{CF}_2)_5\text{CF}_3]\text{TfO}$  (**Lb**) in  $\text{dms0-d}_6$

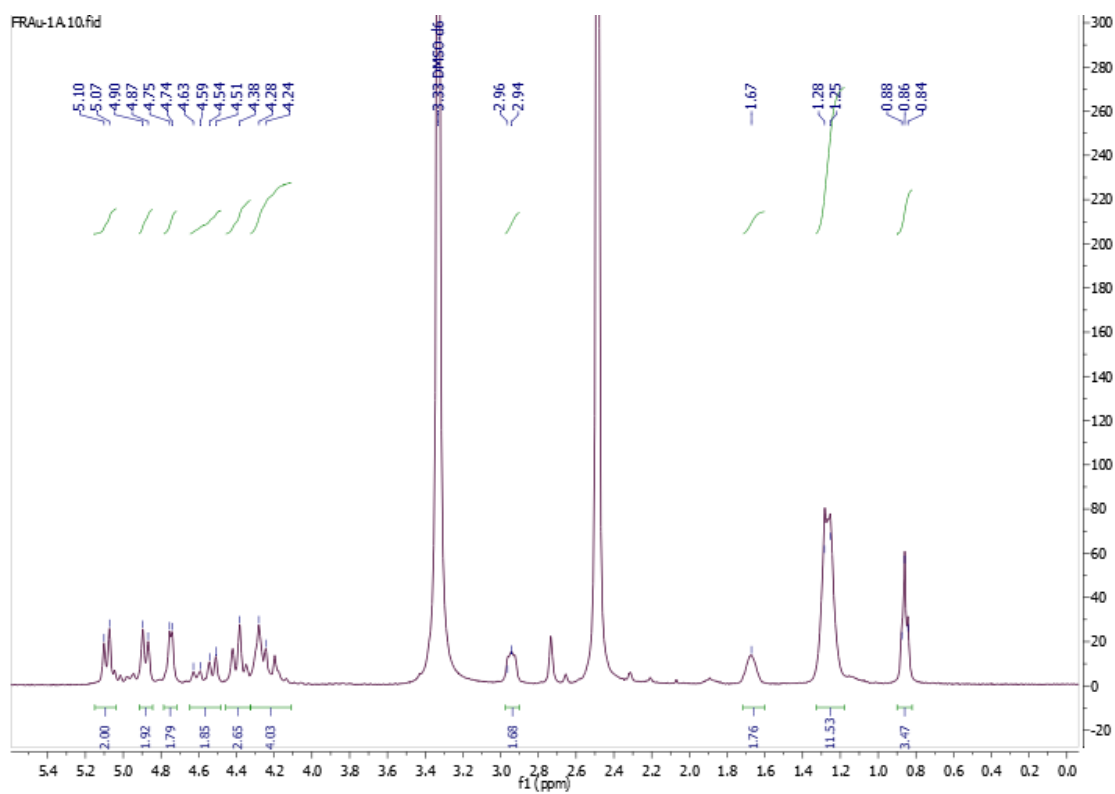

**Figure S12.**  $^1\text{H}$  NMR spectrum of  $[\text{AuCl(PTA-CH}_2(\text{CH}_2)_6\text{CH}_3)]\text{I}$  (**1a**) in  $\text{dms0-d}_6$

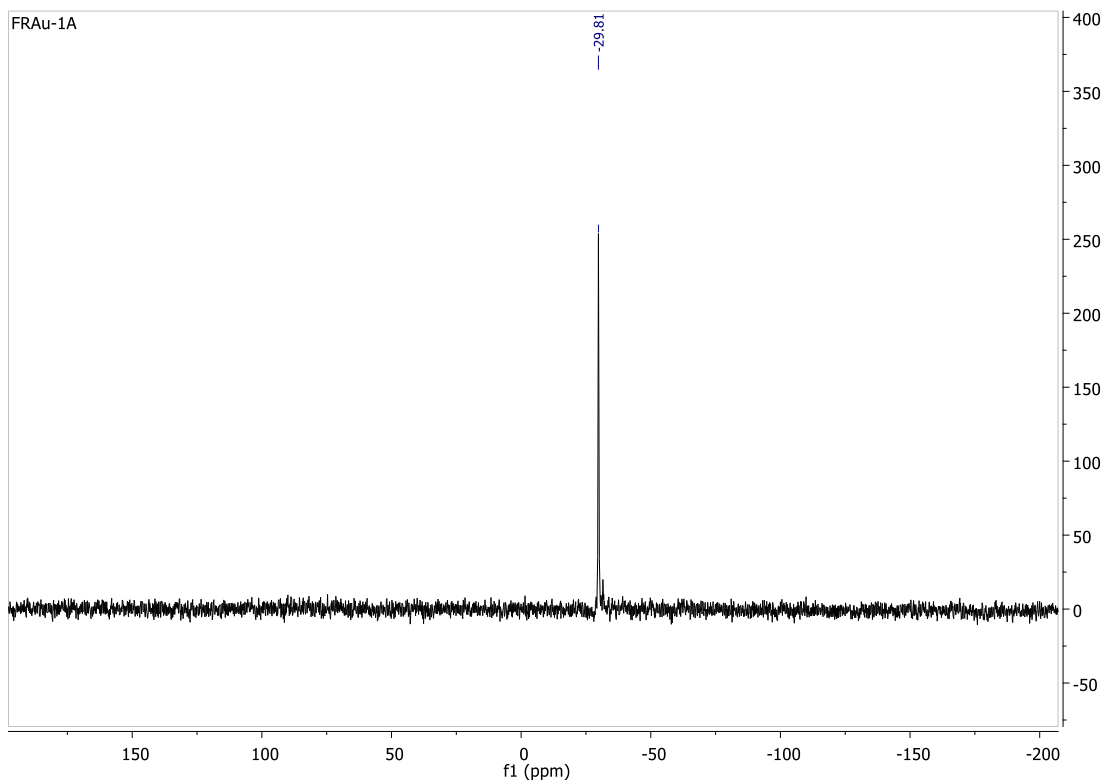

**Figure S13.**  $^{31}\text{P}\{^1\text{H}\}$  NMR spectrum of  $[\text{AuCl}(\text{PTA}-\text{CH}_2(\text{CH}_2)_6\text{CH}_3)]\text{I}$  (**1a**) in  $\text{dms0}-d_6$

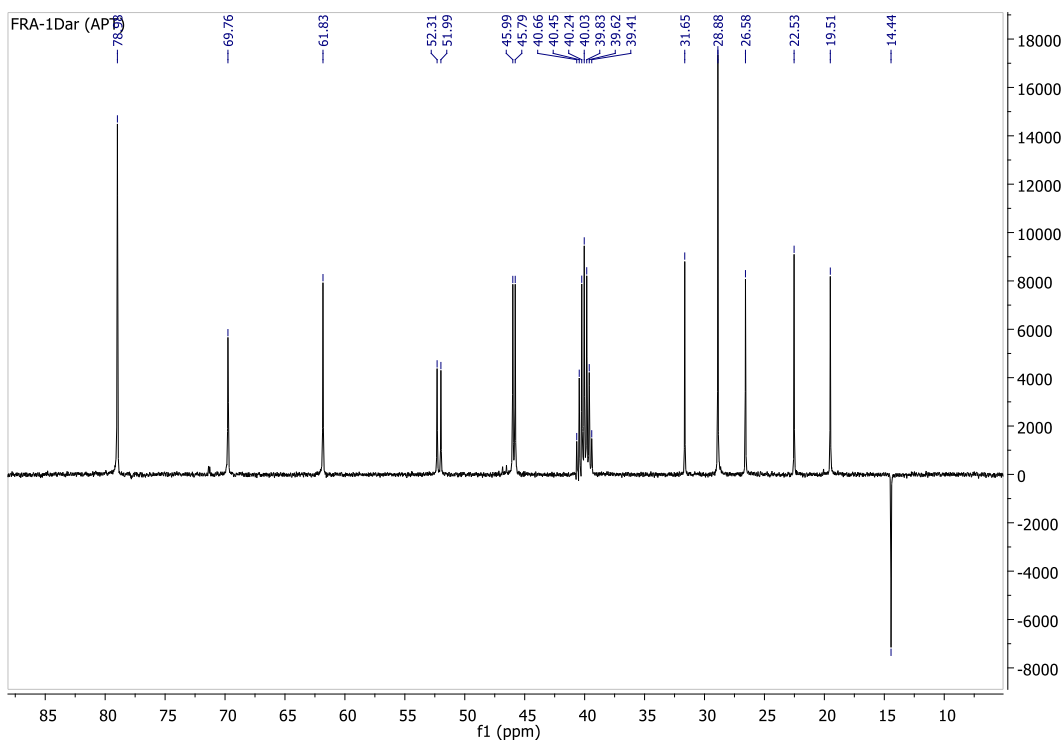

**Figure S14.**  $^{13}\text{C}\{^1\text{H}\}$ -APT spectrum of  $[\text{AuCl}(\text{PTA}-\text{CH}_2(\text{CH}_2)_6\text{CH}_3)]\text{I}$  (**1a**) in  $\text{dms0}-d_6$



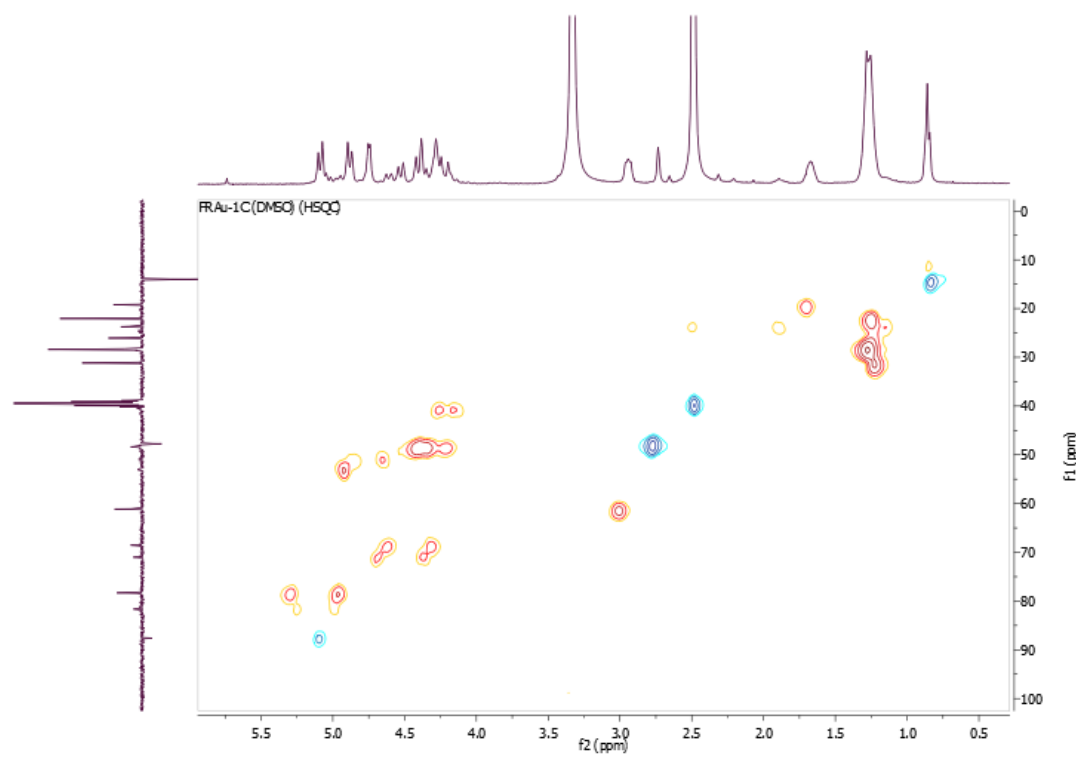

**Figure S15.** C,H-HSQC experiment of  $[\text{AuCl}(\text{PTA}-\text{CH}_2(\text{CH}_2)_6\text{CH}_3)]\text{I}$  (**1a**) in  $\text{dms0-d}_6$

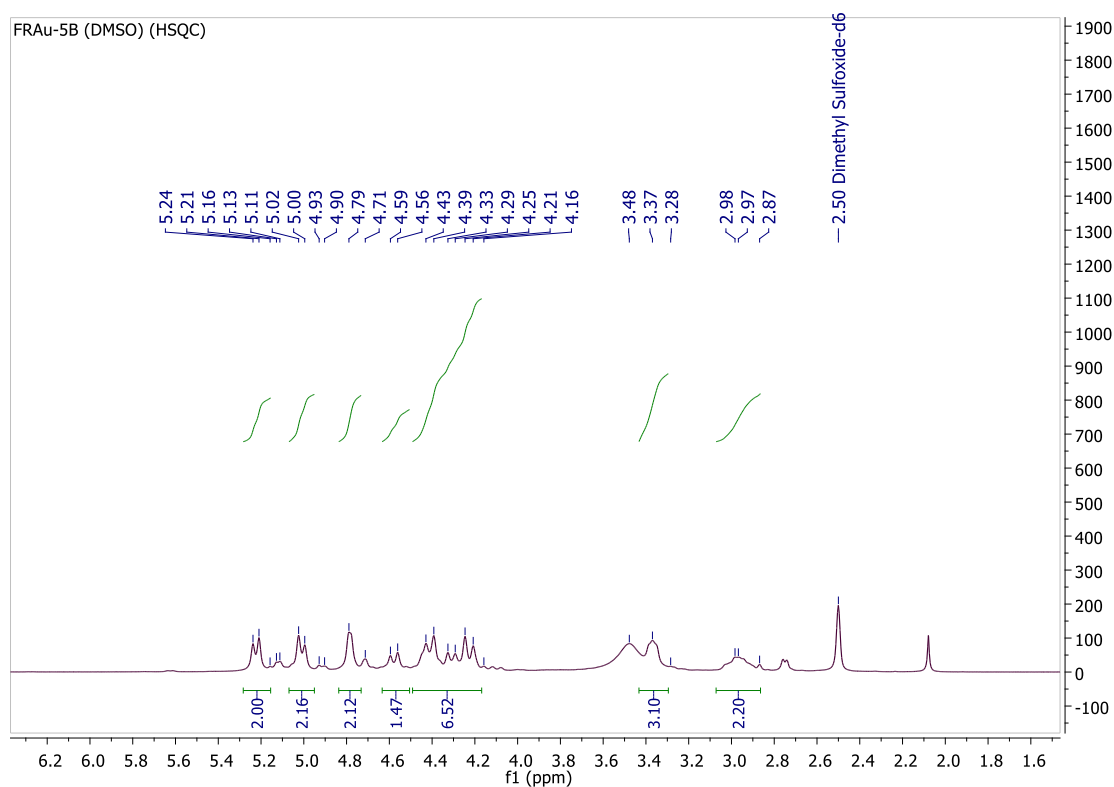

**Figure S16**  $^1\text{H}$  NMR spectrum of  $[\text{AuCl}(\text{PTA}-\text{CH}_2\text{CH}_2(\text{CF}_2)_5\text{CF}_3)]\text{TfO}$  (**1b**) in  $\text{dms0-d}_6$

**Figure 6.25** IR spectrum of compound (**4**)

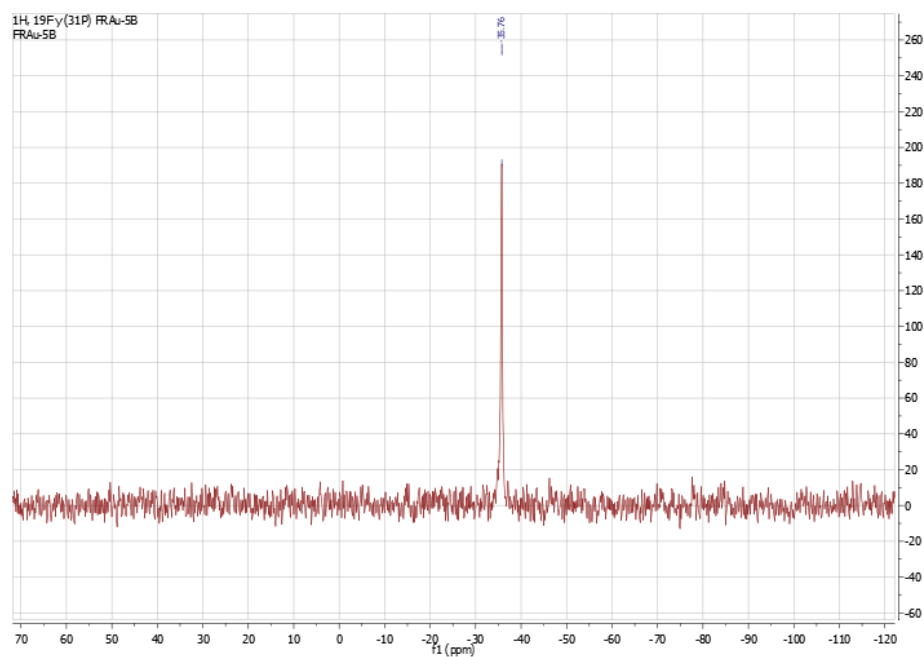

**Figure S17.**  $^{31}\text{P}\{^1\text{H}\}$  NMR spectrum of  $[\text{AuCl}(\text{PTA}-\text{CH}_2\text{CH}_2(\text{CF}_2)_5\text{CF}_3)]\text{TfO}$  (**1b**) in  $\text{dms0}-d_6$

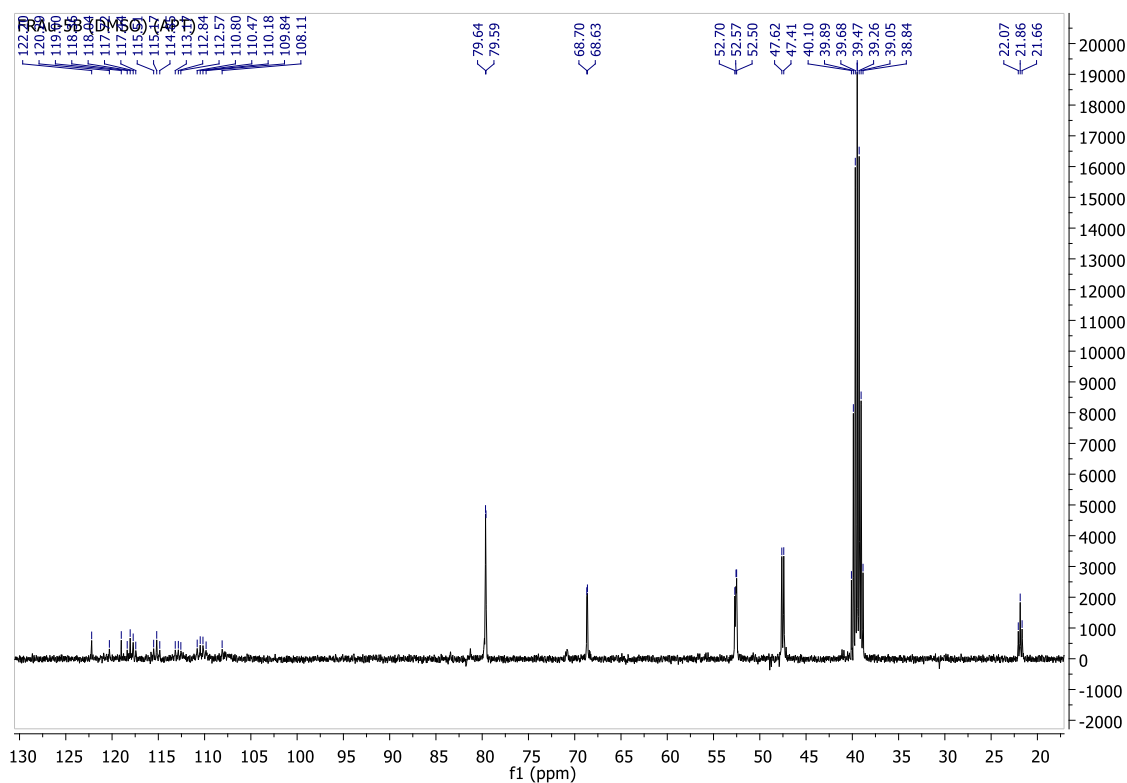

**Figure S18.**  $^{13}\text{C}\{^1\text{H}\}$  NMR spectrum of  $[\text{AuCl}(\text{PTA}-\text{CH}_2\text{CH}_2(\text{CF}_2)_5\text{CF}_3)]\text{TfO}$  (**1b**) in  $\text{dms0}-d_6$

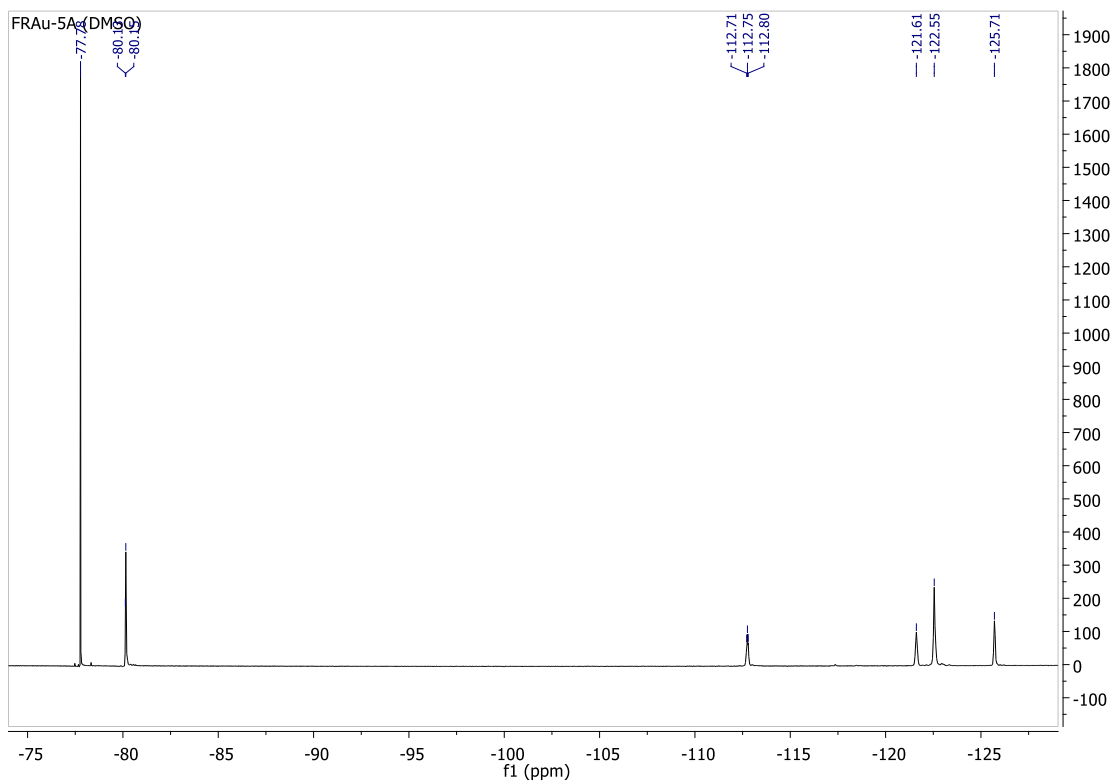

**Figure S19.**  $^{19}\text{F}$   $\{^1\text{H}\}$  NMR spectrum of  $[\text{AuCl}(\text{PTA-CH}_2\text{CH}_2(\text{CF}_2)_5\text{CF}_3)]\text{TfO}$  (**1b**) in  $\text{dmsd-d}_6$

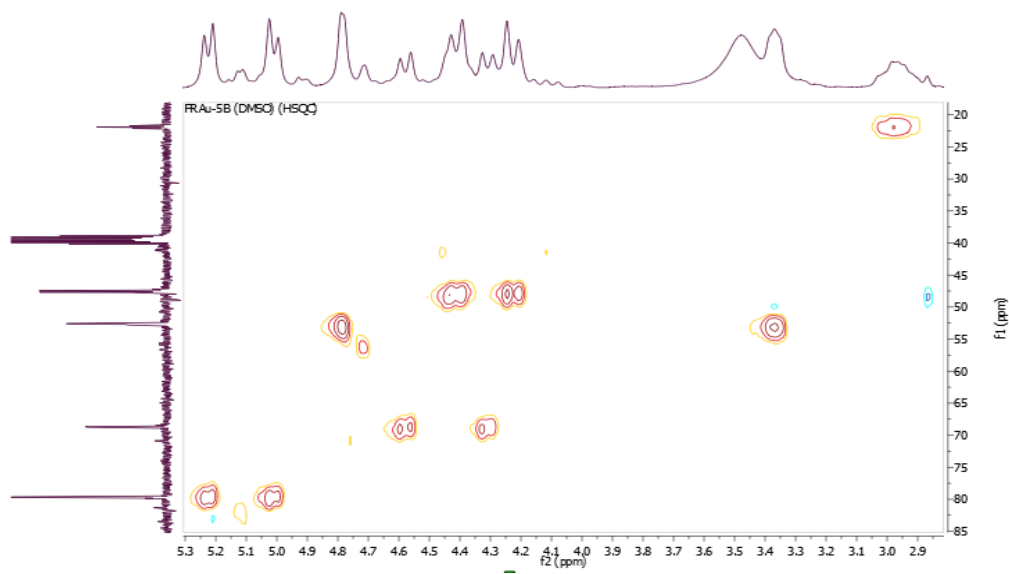

**Figure S20.** C,H-HSQC experiment of  $[\text{AuCl}(\text{PTA-CH}_2\text{CH}_2(\text{CF}_2)_5\text{CF}_3)]\text{TfO}$  (**1b**) in  $\text{dmsd-d}_6$

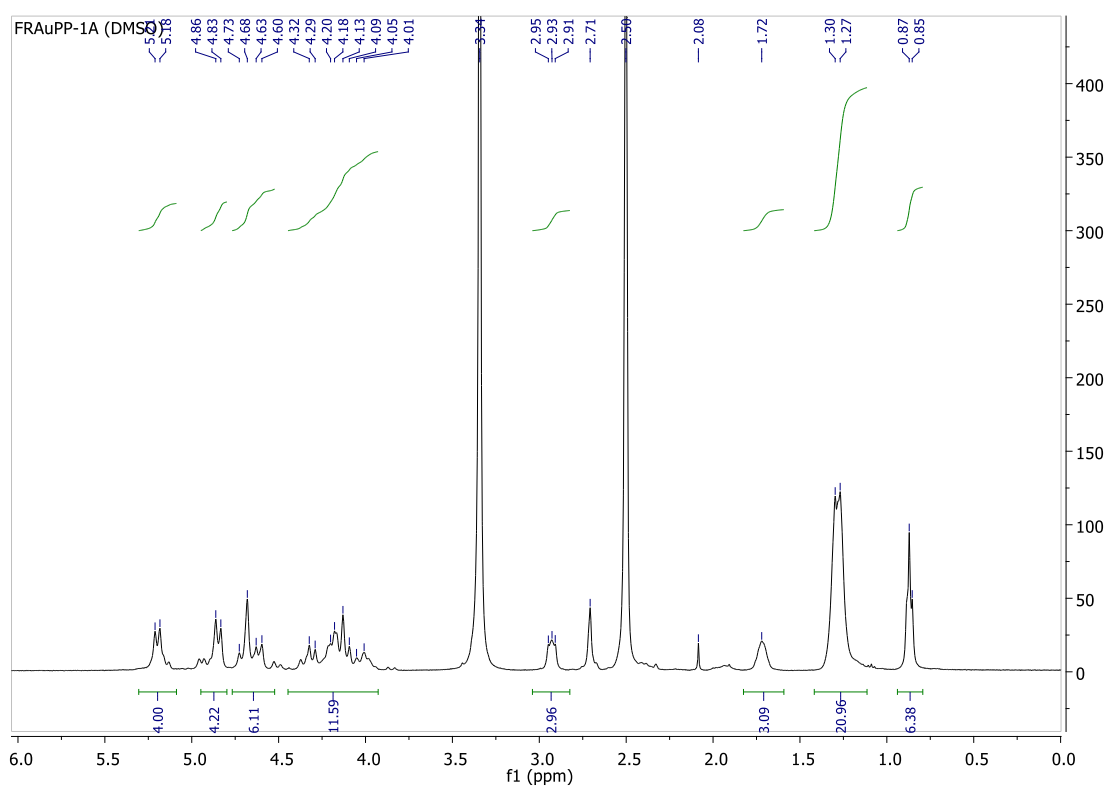

**Figure S21**  $^1\text{H}$  NMR spectrum of  $[\text{AuCl}(\text{PTA-CH}_2(\text{CH}_2)_6\text{CH}_3)_2]\text{I}_2$  (**2a**) in  $\text{dms0-d}_6$

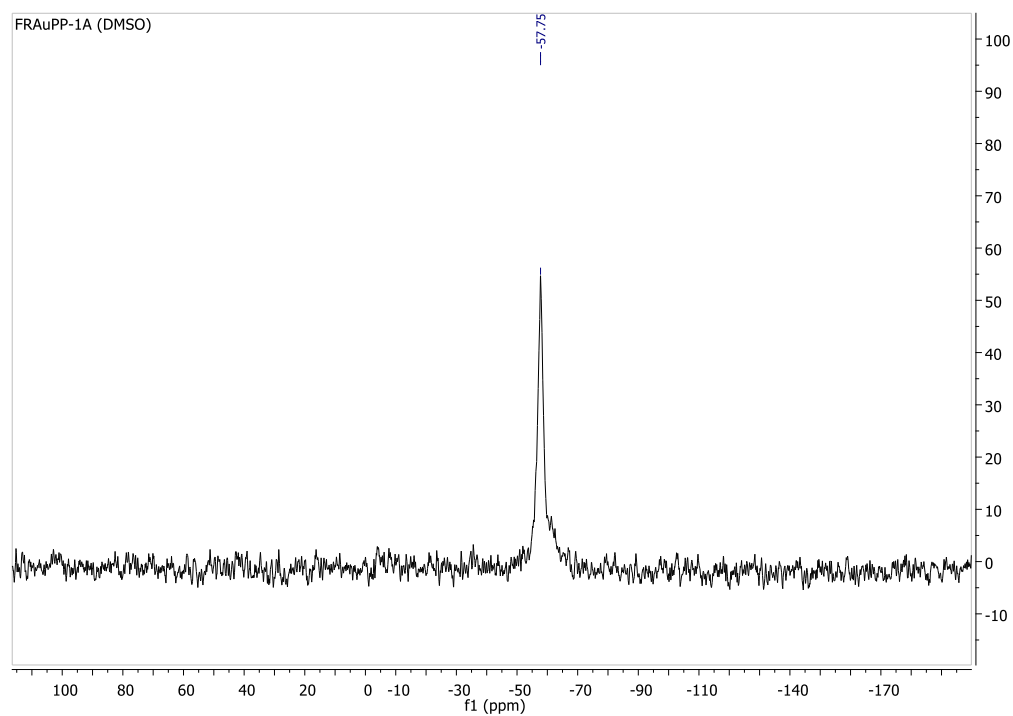

**Figure S22.**  $^{31}\text{P}\{^1\text{H}\}$  NMR spectrum of (**2a**) in  $\text{dms0-d}_6$

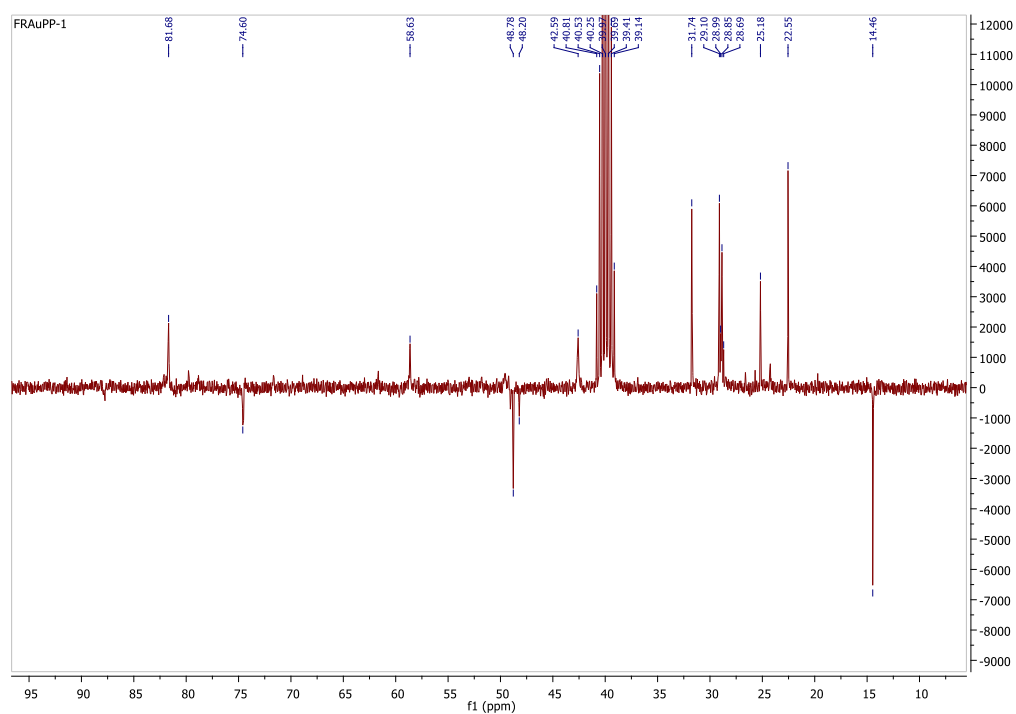

**Figure S23.**  $^{13}\text{C}$   $\{^1\text{H}\}$ -APT spectrum of (**2a**) in  $\text{dmsO-d}_6$

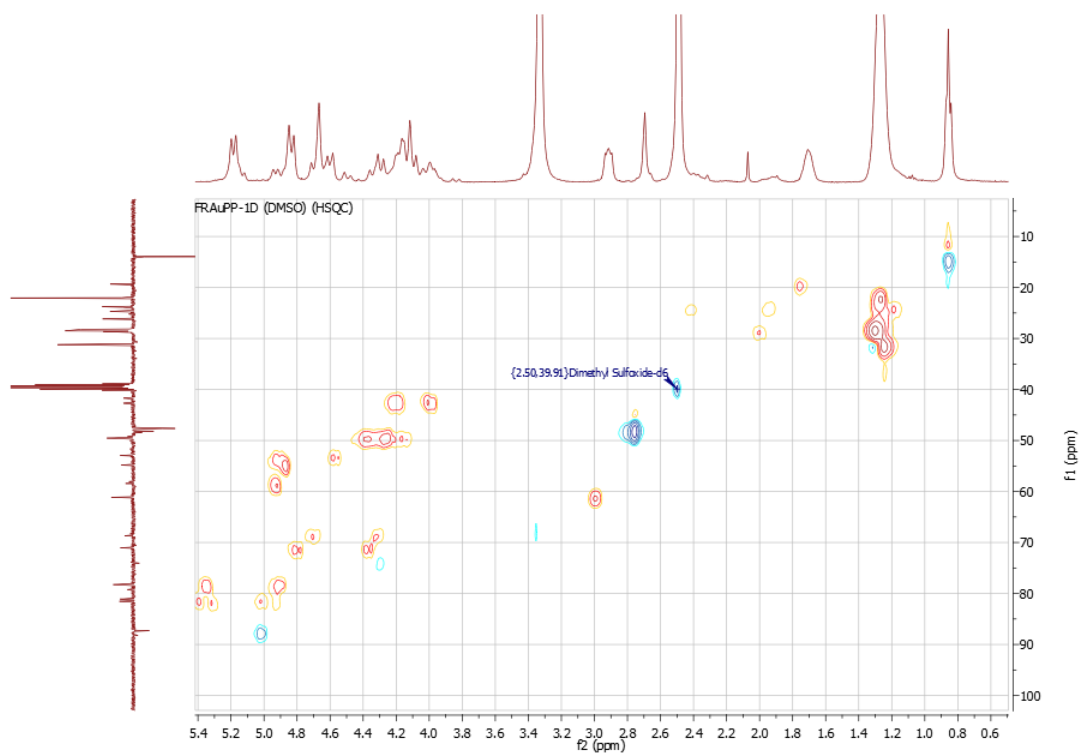

**Figure S24.** C,H-HSQC experiment of  $[\text{AuCl}(\text{PTA-CH}_2(\text{CH}_2)_6\text{CH}_3)_2]\text{I}_2$  (**2a**) in  $\text{dmsO-d}_6$



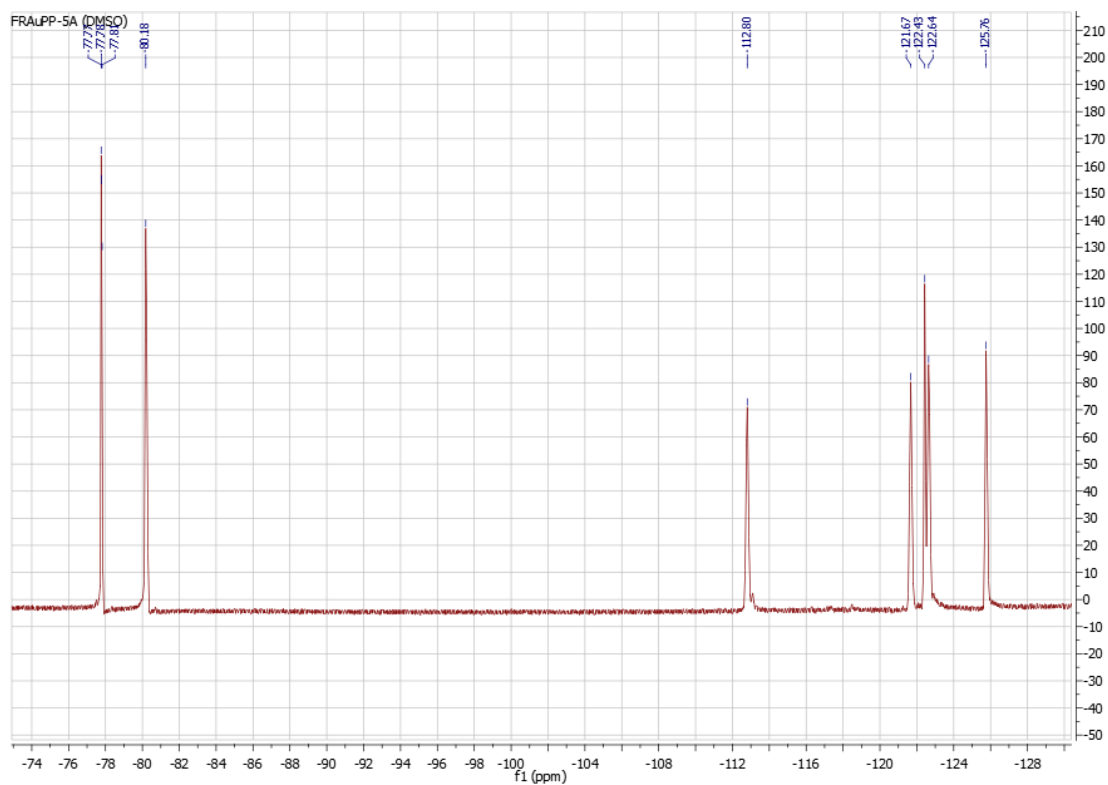

**Figure S27.**  $^{19}\text{F}$   $\{^1\text{H}\}$  NMR of  $[\text{AuCl}(\text{PTA}-\text{CH}_2\text{CH}_2(\text{CF}_2)_5\text{CF}_3)_2](\text{TfO})_2$  (**2b**) in  $\text{dmsd}-d_6$

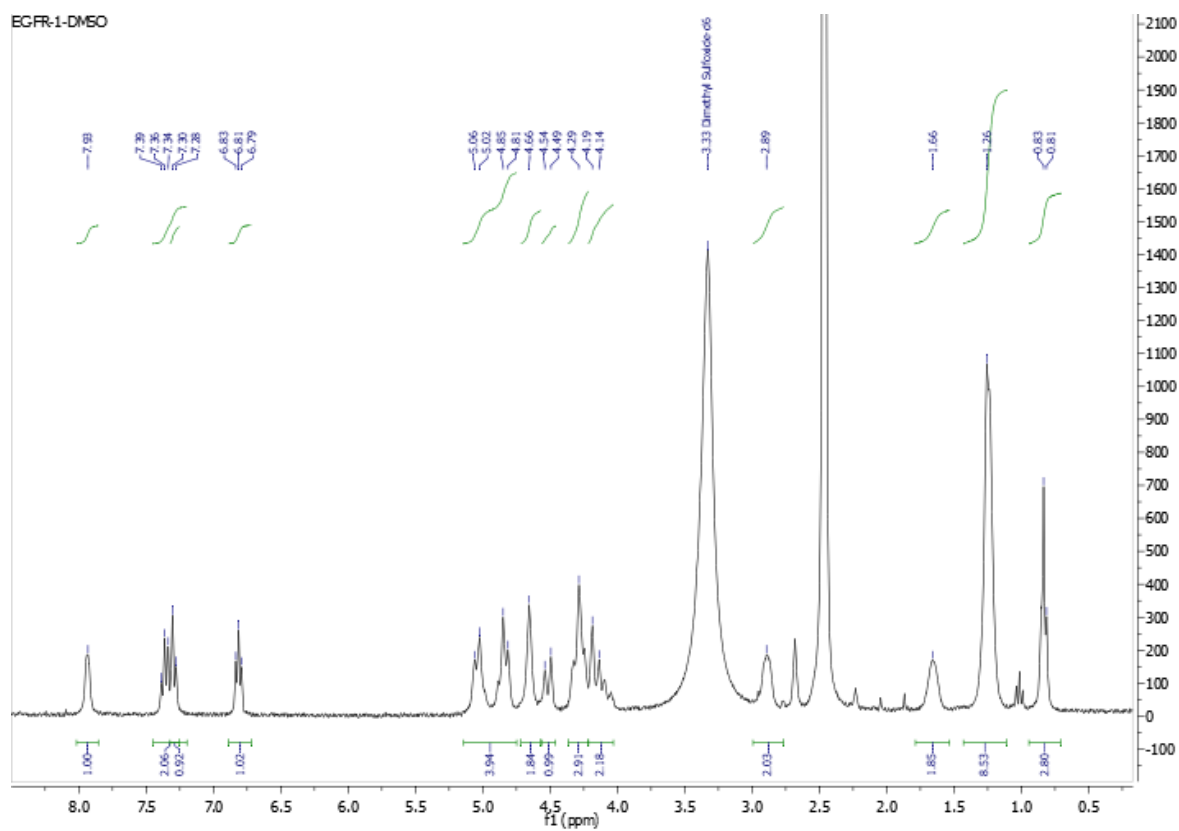

**Figure S28.**  $^1\text{H}$  NMR spectrum of  $[\text{Au}(\text{C}_5\text{H}_5\text{NS})(\text{PTA}-\text{CH}_2(\text{CH}_2)_6\text{CH}_3)]\text{I}$  (**3a**) in  $\text{dmsd}-d_6$

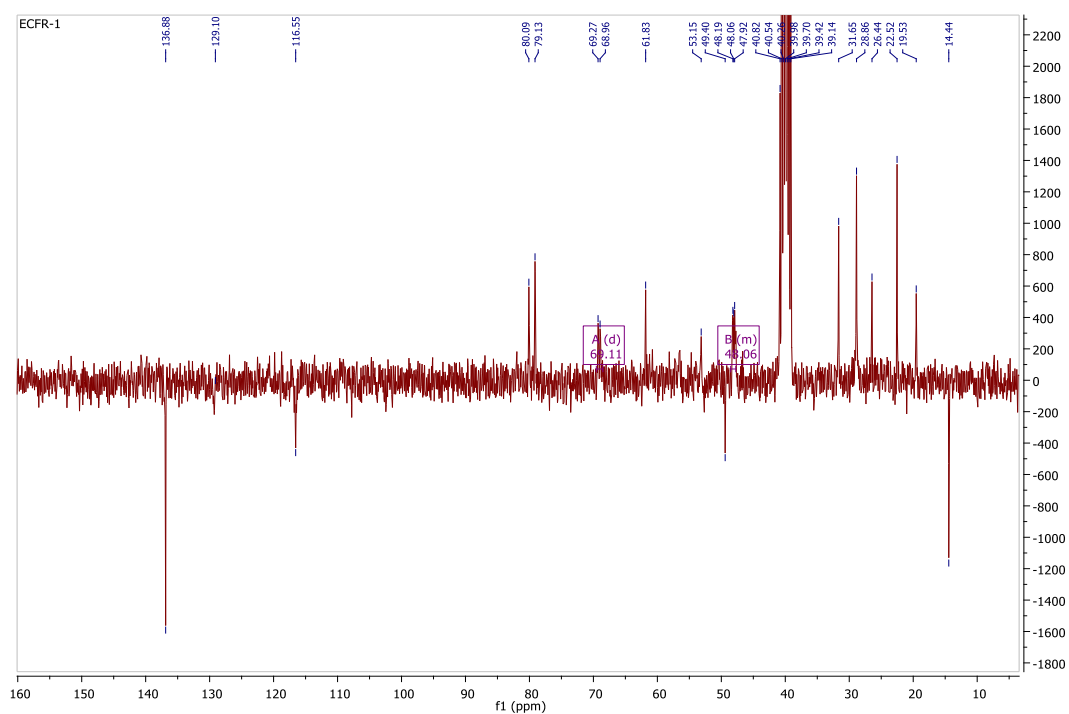

**Figure S29.**  $^{13}\text{C}$   $\{^1\text{H}\}$ -apt NMR spectrum of  $[\text{Au}(\text{C}_5\text{H}_5\text{NS})(\text{PTA}-\text{CH}_2(\text{CH}_2)_6\text{CH}_3)]\text{I}$  (**3a**) in  $\text{dmsO}-d_6$

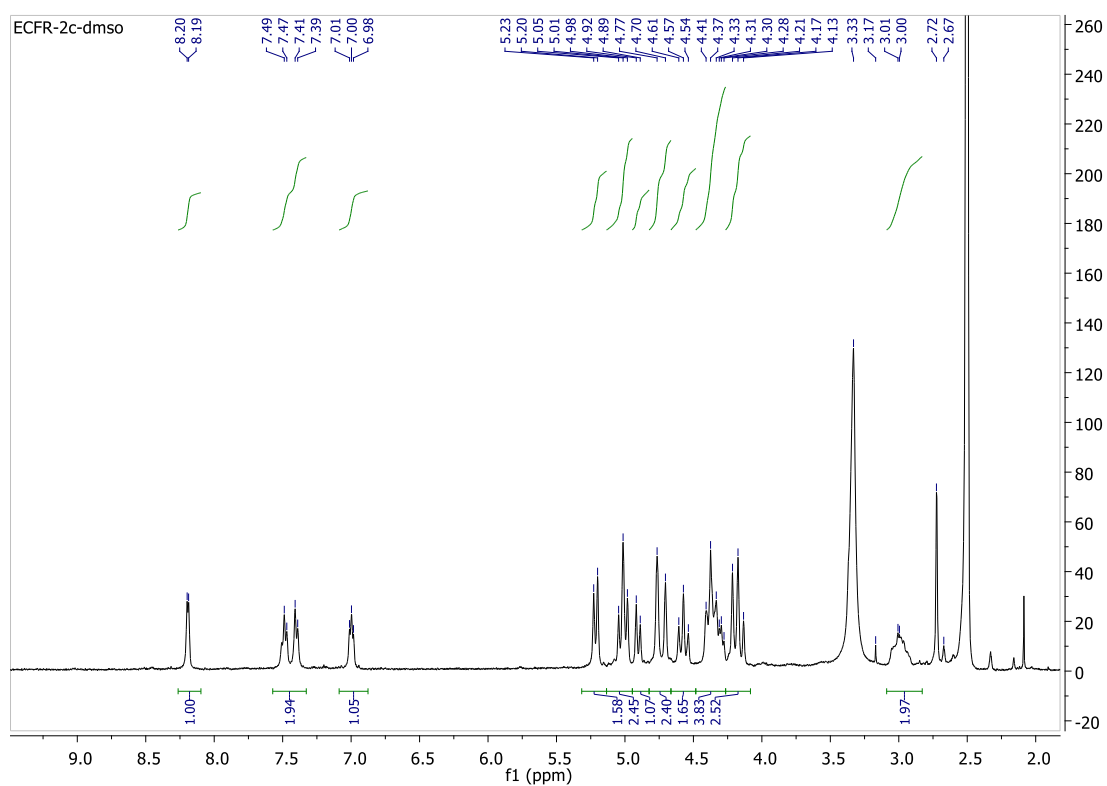

**Figure S30.**  $^1\text{H}$  NMR spectrum of  $[\text{Au}(\text{C}_5\text{H}_5\text{NS})(\text{PTA}-\text{CH}_2\text{CH}_2(\text{CF}_2)_5\text{CF}_3)]\text{TfO}$  (**3b**) in  $\text{dmsO}-d_6$



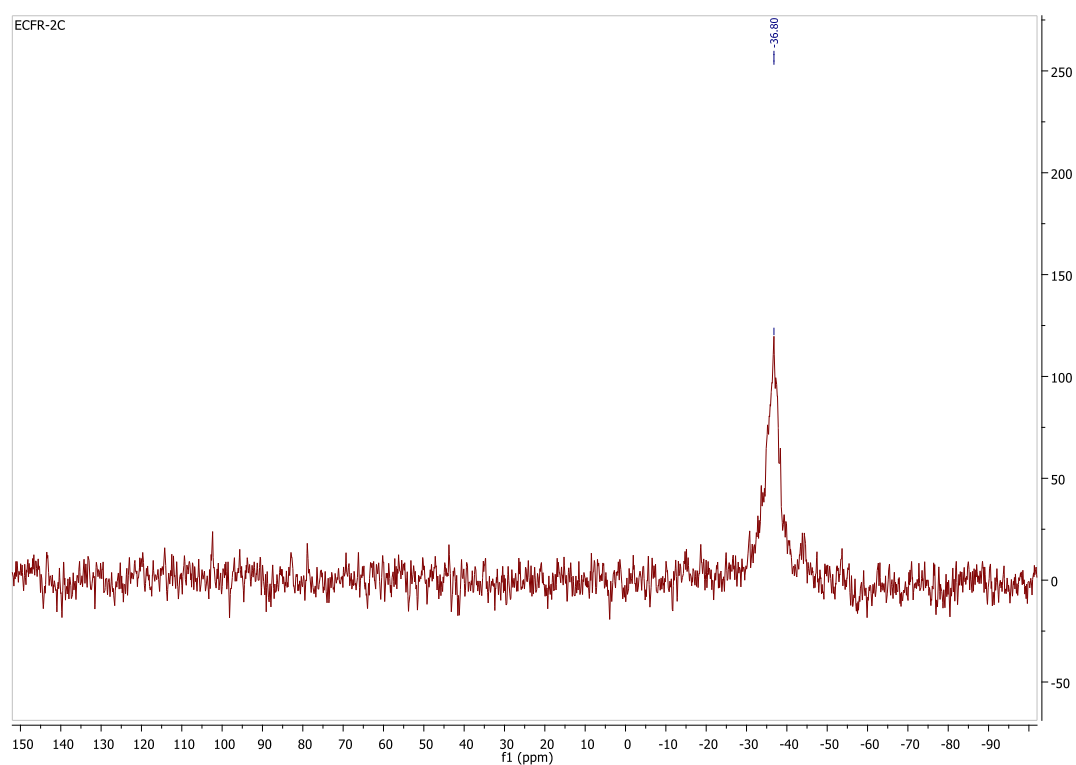

**Figure S36.**  $^{31}\text{P}\{^1\text{H}\}$  NMR spectrum of **3b**

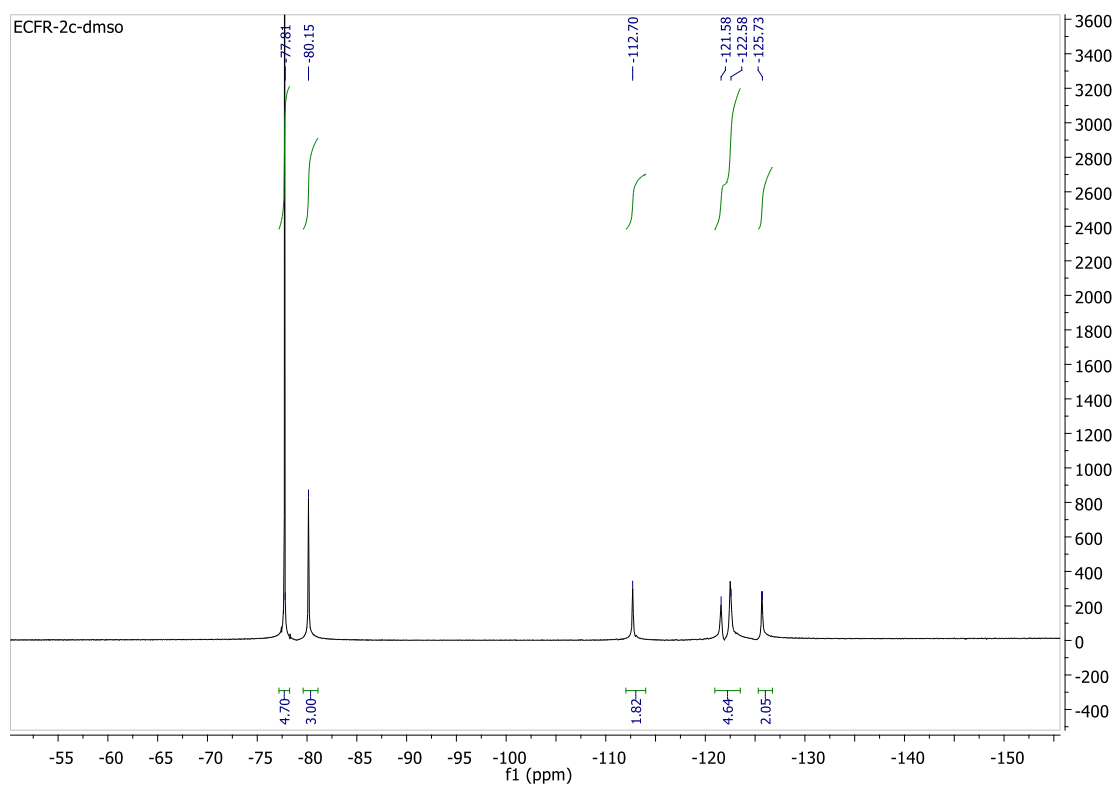

**Figure S37.**  $^{19}\text{F}\{^1\text{H}\}$  NMR spectrum of **3b**

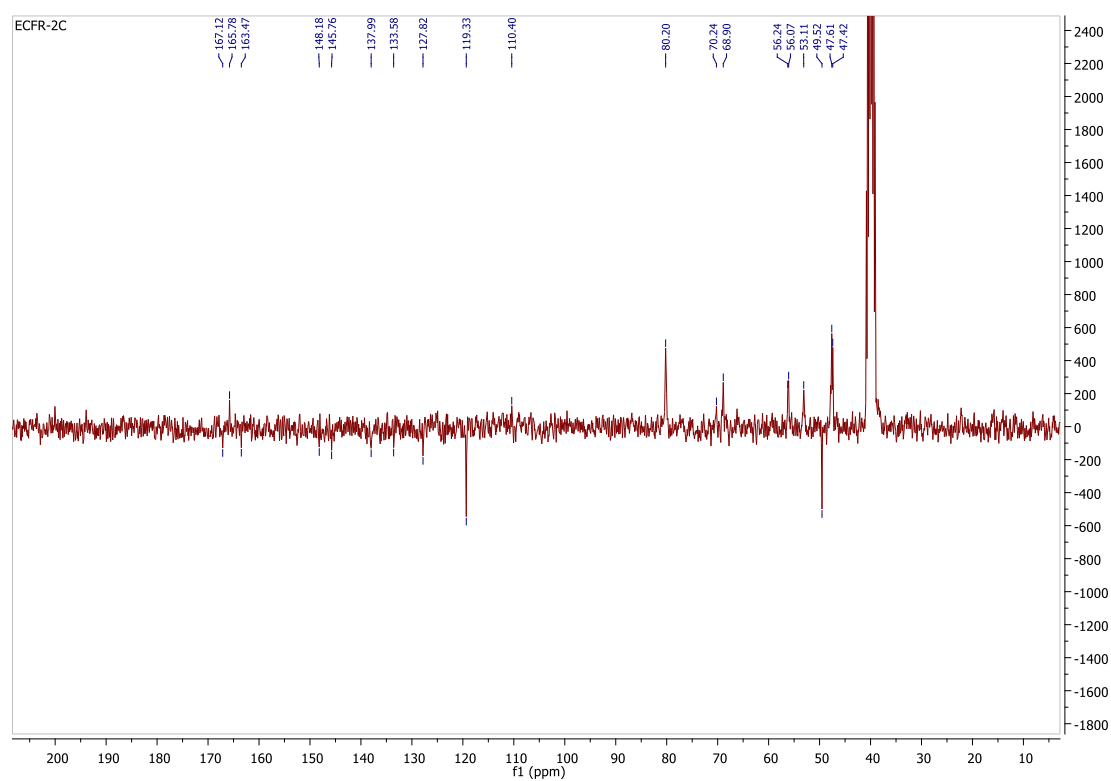

**Figure S38.**  $^{13}\text{C}$  { $^1\text{H}$ }-apt NMR spectrum of **3b**

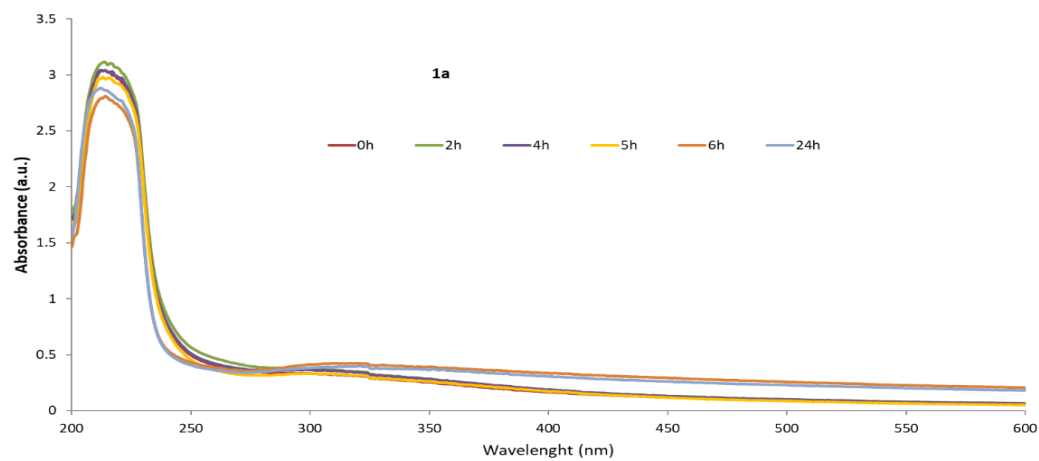

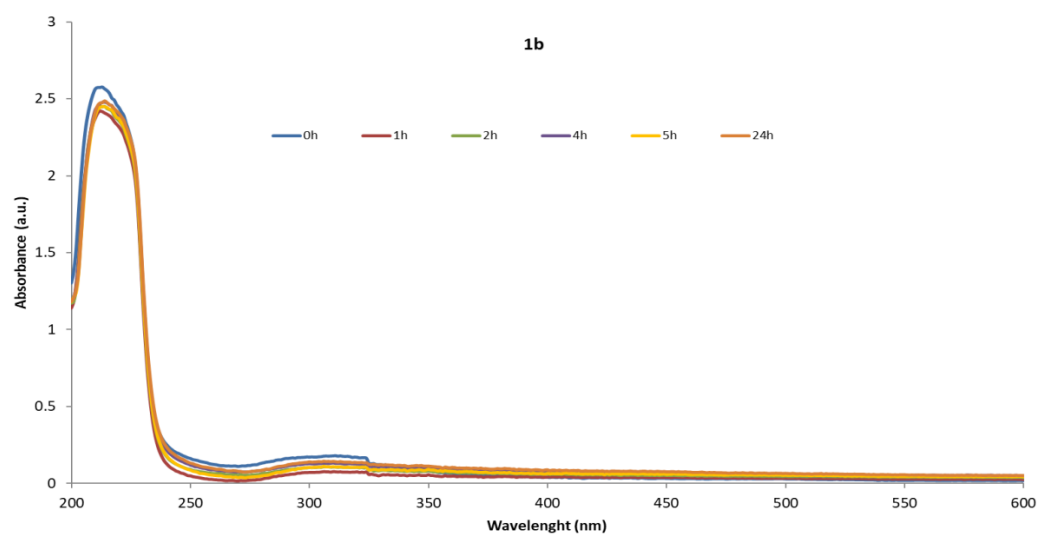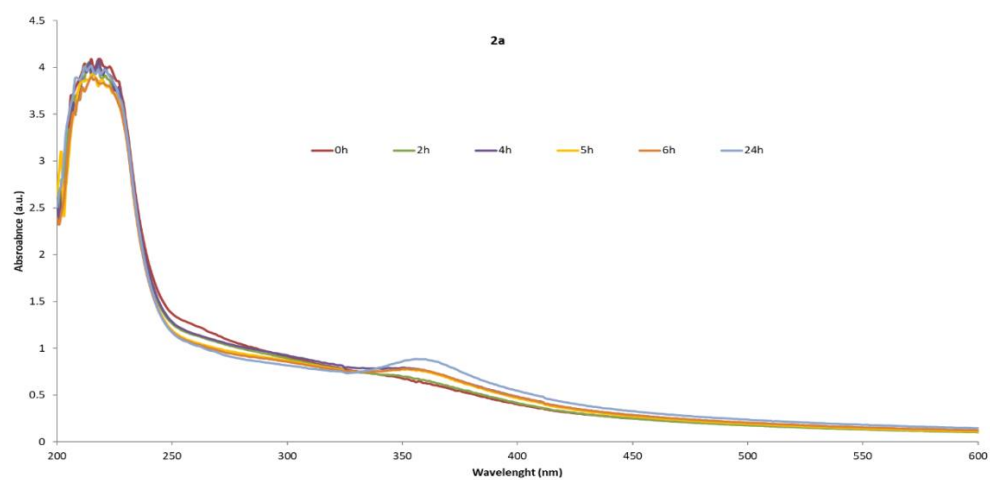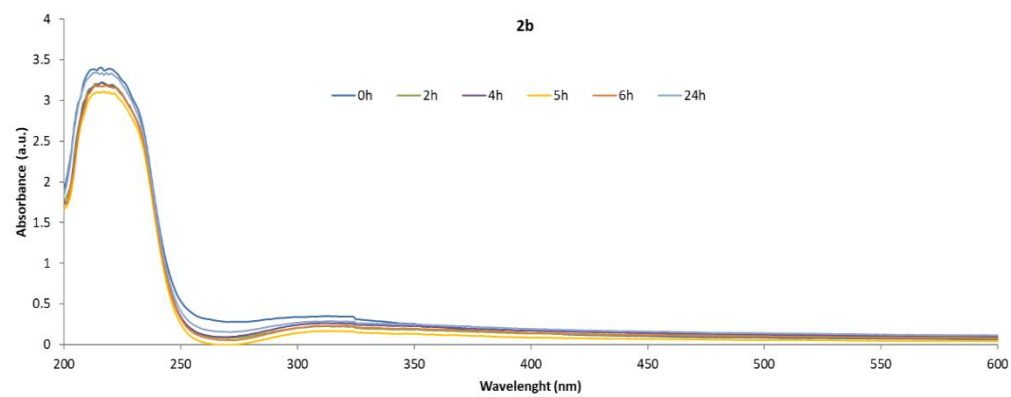

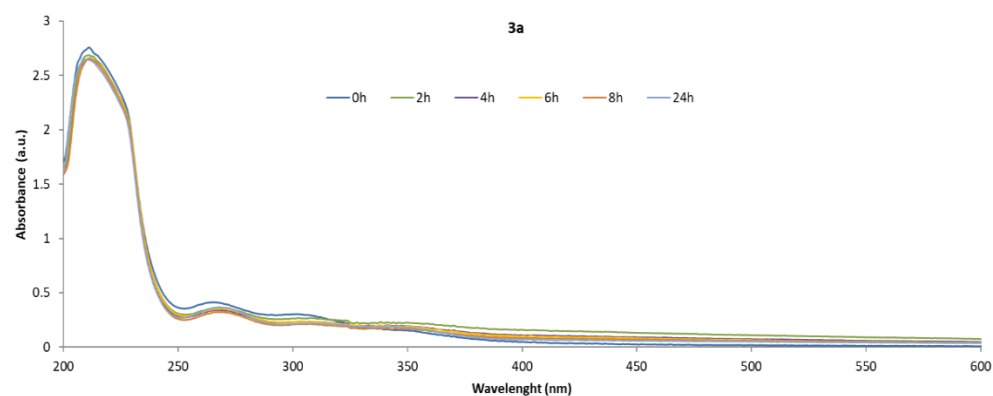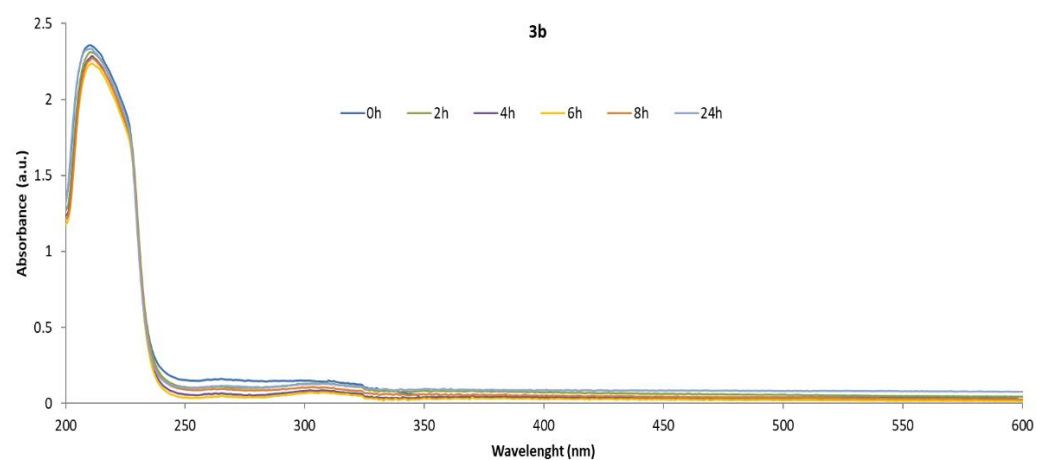

**Figure S39.** UV-Vis spectra of gold complexes recorded at different times for 24 h to test their stability under physiological conditions. [complex] = 30  $\mu$ M diluted in PBS at 37  $^{\circ}$ C.

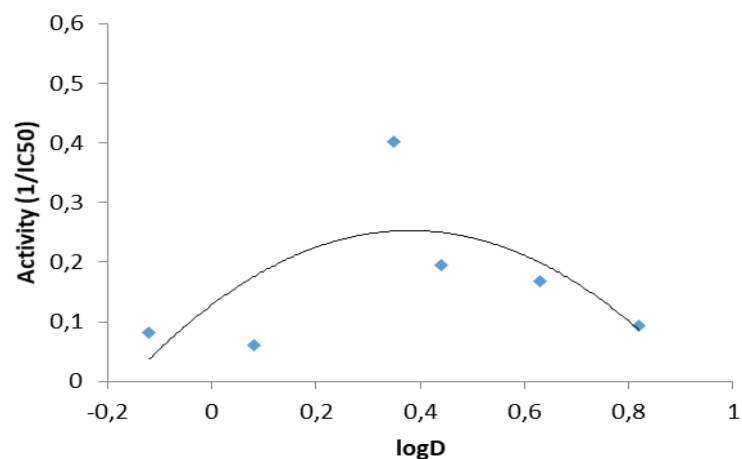

**Figure S40.** Correlation between cytotoxic activity of the complexes and logD<sub>7.4</sub>. The activities are calculated as the inverse of IC<sub>50</sub> in Caco-2/PD7 cells.
